# Supplementary material for: Circulating CXCR5−PD-1hi peripheral T helper cells are associated with progression to type 1 diabetes
Source: Springer Nature journal article supplement (doi:10.1007/s00125-019-4936-8), 2019-07-03
Supplement: MOESM1 [file 16878770]

**ESM Table 1** Fluorescent monoclonal antibodies used in the study

| Antigen       | Clone     | Fluorochrome | Manufacturer             |
|---------------|-----------|--------------|--------------------------|
| CD3           | SK7       | APC-F750     | Biolegend, San Diego, CA |
| CD4           | RPA-T4    | APC-H7       | BD Biosciences           |
|               |           | APC-F750     | Biolegend                |
|               |           | FITC         | Biolegend                |
|               |           | PE-Cy7       | Biolegend                |
|               |           | BV510        | Biolegend                |
| CD45RA        | H100      | FITC         | Biolegend                |
|               |           | PerCP-Cy5.5  | Biolegend                |
| CCR7          | G043H7    | A647         | Biolegend                |
| CD27          | M-T271    | BV421        | Biolegend                |
|               |           | APC-R700     | BD Biosciences           |
|               |           | PerCP-Cy5.5  | Biolegend                |
| CD25          | BC96      | PE-Cy7       | Biolegend                |
| PD-1          | EH12.2H7  | PE           | Biolegend                |
| ICOS          | C398.4A   | A647         | Biolegend                |
|               |           | APC          | Biolegend                |
| HLA-DR        | L243      | BV421        | Biolegend                |
| CXCR3         | G025H7    | A647         | Biolegend                |
| CXCR5         | J252D4    | PerCP-Cy5.5  | Biolegend                |
|               | RF8B2     | BB515        | BD Biosciences           |
| CX3CR1        | 2A9-1     | A647         | Biolegend                |
| CCR2          | K036C2    | BV421        | Biolegend                |
|               |           | BV605        | Biolegend                |
| CCR5          | J418F1    | BV421        | Biolegend                |
| IFN- $\gamma$ | 4S.B3     | APC          | Biolegend                |
| IL-2          | MQ1-17H12 | PE-Cy7       | Biolegend                |
| IL-21         | 3A3-N2    | BV421        | BD Biosciences           |
| CD19          | HIB19     | BV510        | Biolegend                |
| CD20          | 2H7       | APC          | BD Biosciences           |
| IgD           | IA6-2     | A488         | Biolegend                |
| CD38          | HIT2      | BV421        | Biolegend                |
| CD138         | MI15      | PE           | Biolegend                |
| CD14          | M5E2      | BV510        | Biolegend                |
| CD56          | HCD56     | BV510        | Biolegend                |
| Zombie Aqua   | Live/Dead |              | Biolegend                |

Each antibody was titrated before use to ensure an optimal signal-to-noise ratio.

**ESM Table 2** Characteristics of autoantibody-positive at-risk children

|                                                 | <b>Nonprogressors (n=25)</b> | <b>Progressors (n=15)</b> |
|-------------------------------------------------|------------------------------|---------------------------|
| <b>Age at sampling (years +/-SD)</b>            | 9.3 +/- 4.8                  | 9.4 +/- 4.6               |
| <b>Age at first AAb (years +/-SD)</b>           | 4.8 +/- 4.0                  | 3.8 +/- 2.8               |
| <b>HLA class II genotype<sup>1</sup> (%)</b>    |                              |                           |
| DQ2.5/x                                         | 2/25 (8.0%)                  | 4/15 (26.7%)              |
| DQ8/x                                           | 18/25 (72.0%)                | 6/15 (40.0%)              |
| DQ2.5/DQ8                                       | 5/25 (20.0%)                 | 5/15 (33.3%)              |
| <b>Number of autoantibodies<sup>2</sup> (%)</b> |                              |                           |
| 1                                               | 9/25 (36.0%)                 | 4/15 (26.7%)              |
| 2                                               | 13/25 (52.0%)                | 8/15 (53.3%)              |
| 3                                               | 3/25 (12.0%)                 | 3/15 (20.0%)              |

<sup>1</sup>DQ2.5 = DQA1\*05-DQB1\*02, DQ8 = DRB1\*04-DQA1\*03-DQB1\*0302, x ≠ DQB1\*0602

<sup>2</sup> number of biochemical autoantibodies (IAA, GADA and IA-2A) detected at sampling

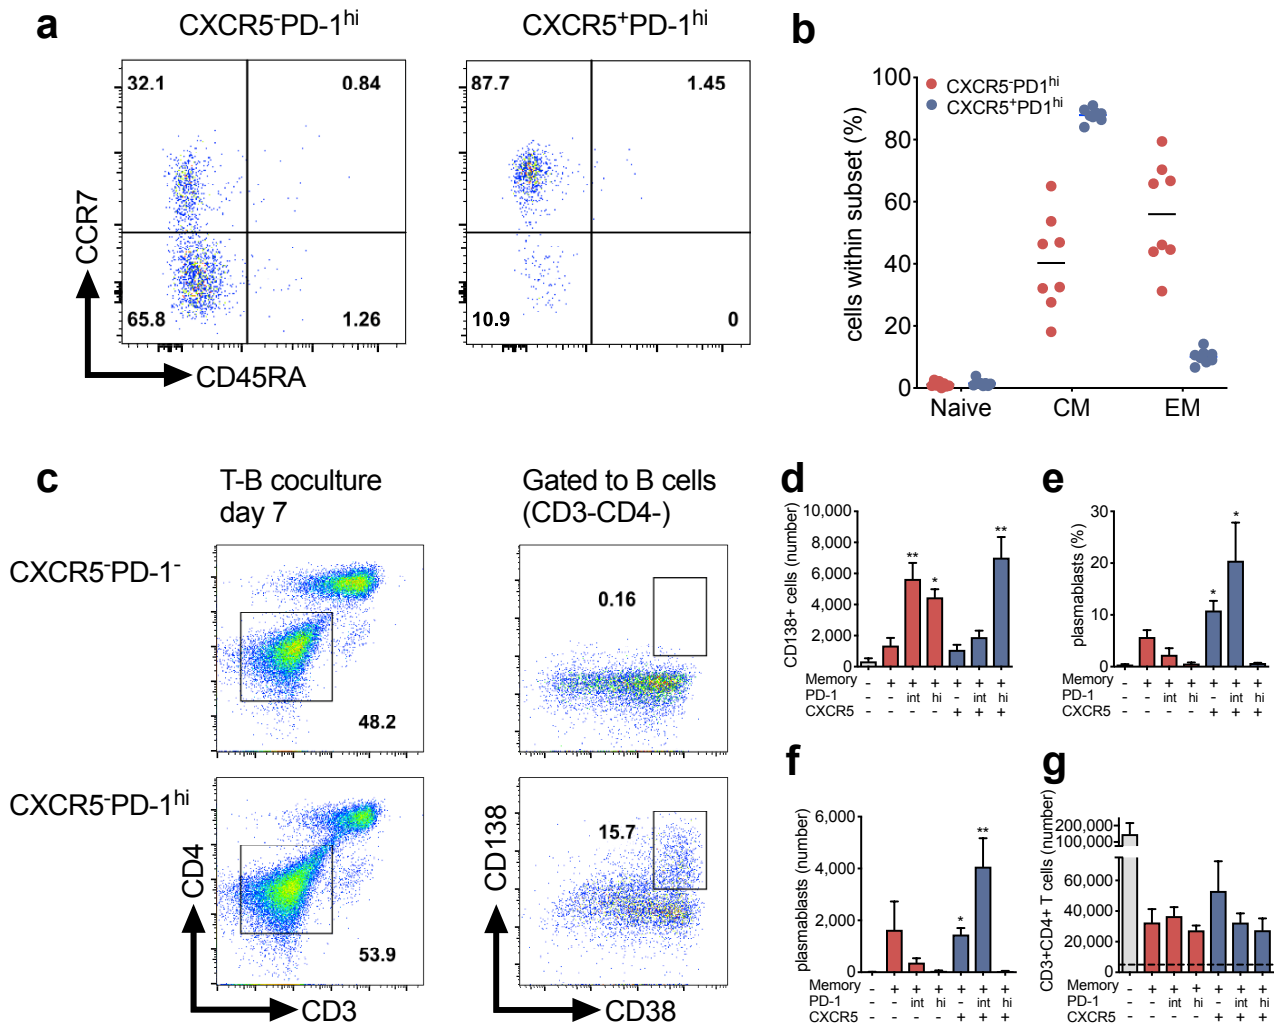

**ESM Figure 1** (a) Representative staining of CD45RA and CCR7 on CD3<sup>+</sup>CD4<sup>+</sup> CXCR5-PD-1<sup>hi</sup> and CXCR5<sup>+</sup>PD-1<sup>hi</sup> T cells. (b) The distribution of CXCR5-PD-1<sup>hi</sup> and CXCR5<sup>+</sup>PD-1<sup>hi</sup> T cells within naïve (CD45RA<sup>+</sup>CCR7<sup>+</sup>), central memory (CM, CD45RA<sup>-</sup>CCR7<sup>+</sup>) and effector memory (EM, CD45RA<sup>-</sup>CCR7<sup>-</sup>) subsets in eight healthy donors analyzed. For the T-cell and B-cell coculture assays different sorted T-cell subsets were cocultured with either memory (CD27<sup>+</sup>) or naïve (CD27<sup>-</sup>) B cells and the frequencies of T cells (CD3<sup>+</sup>CD4<sup>+</sup>), plasma cells (CD3<sup>-</sup>CD4<sup>-</sup>CD38<sup>hi</sup>CD138<sup>+</sup>) and plasmablasts (CD3<sup>-</sup>CD4<sup>-</sup>CD20<sup>low</sup>CD38<sup>hi</sup>) were analyzed after 7 days. (c) A representative example of the assay with CXCR5-PD-1<sup>-</sup> (top panels) and CXCR5-PD-1<sup>hi</sup> memory CD4<sup>+</sup> T cells (bottom panels) cocultured with memory B cells is shown. (d) Absolute numbers of CD138<sup>+</sup> plasma cells in cocultures with memory B cells were determined with counting beads. (e, f) Frequencies and absolute numbers of plasmablasts in cocultures with naïve B cells, and (g) the absolute number of T cells in cocultures with memory B cells. The dashed line indicates the input number of T cells in the coculture (5000 T cells). The results are expressed as mean +/-SEM of four separate experiments performed with cells from different healthy donors. \**p*<0.05 and \*\* *p*<0.01 compared to naïve CD4<sup>+</sup> T cells (grey bars); Kruskal–Wallis test with Dunn’s post hoc test

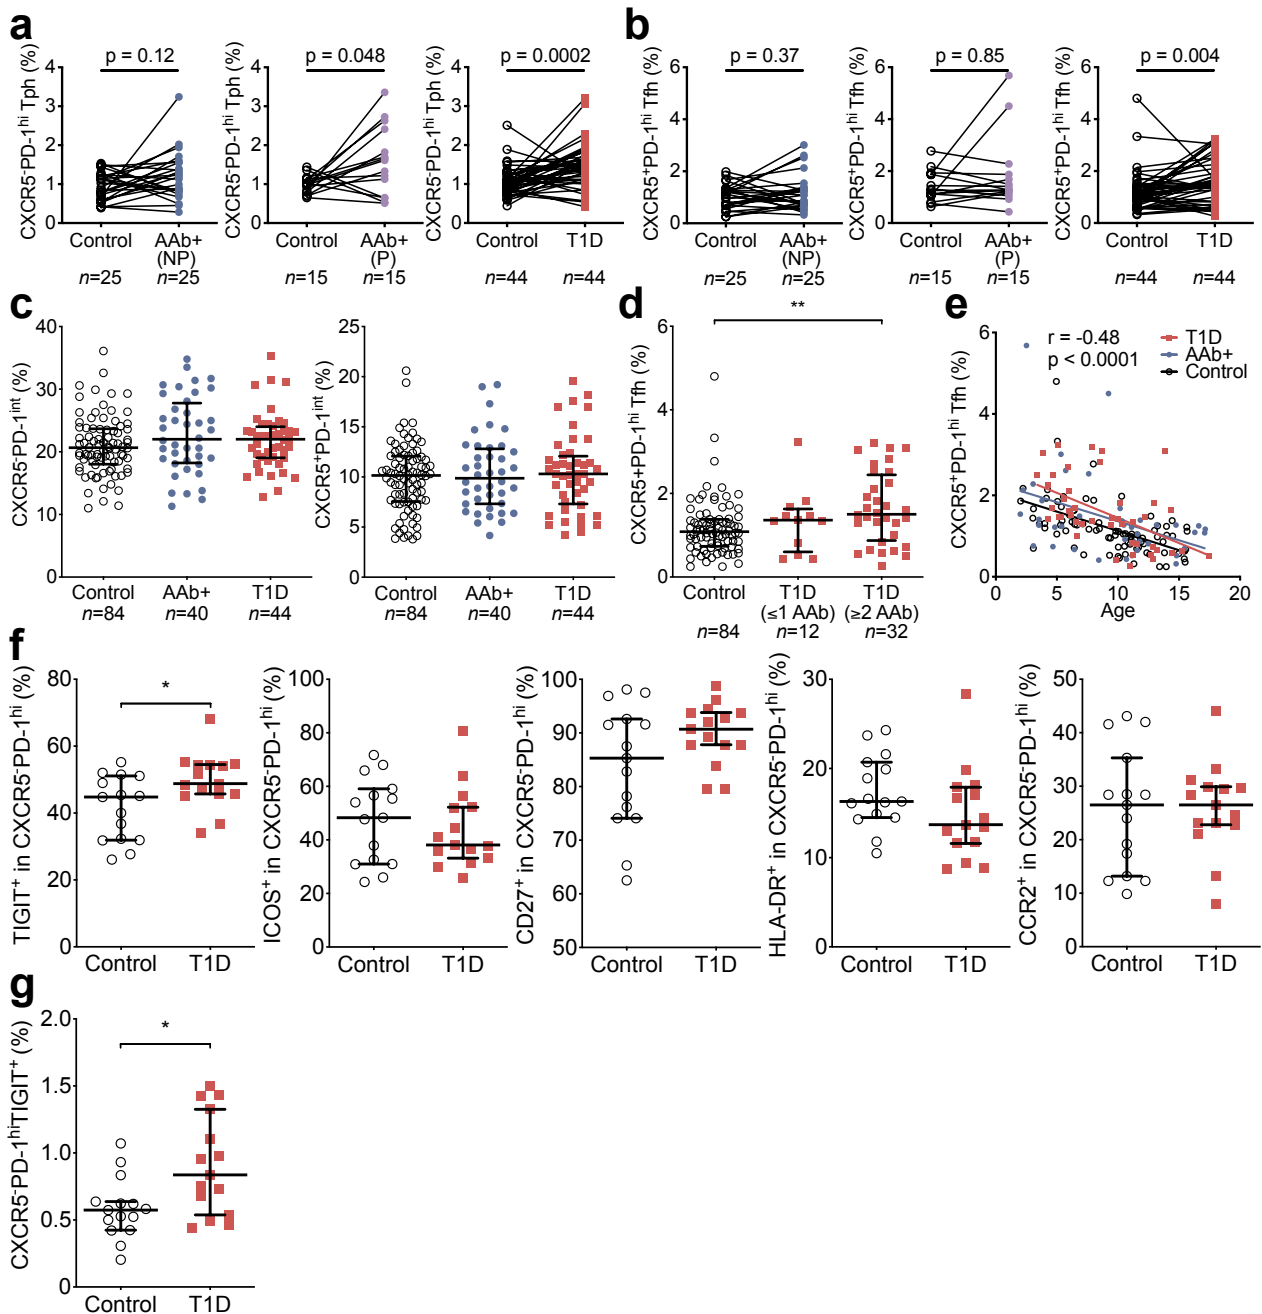

**ESM Figure 2 (a,b)** Pairwise analyses of CXCR5-PD-1<sup>hi</sup> Tph and CXCR5+PD-1<sup>hi</sup> Tfh cell frequencies. Samples from autoantibody-positive at-risk children (AAb+) who did not progress (NP) or progressed (P) to type 1 diabetes (T1D) and from children with newly diagnosed T1D were compared to samples from age-matched healthy children (control) processed and analyzed in parallel. *p* values from paired Wilcoxon tests are indicated. **(c)** The frequencies of CXCR5-PD-1<sup>int</sup> and CXCR5+PD-1<sup>int</sup> memory CD4<sup>+</sup> T cells in the study groups. **(d)** CXCR5+PD-1<sup>hi</sup> Tfh cell frequencies in children with newly diagnosed T1D stratified based on the number of biochemical autoantibodies (IAA, GADA and IA-2A) detected in their blood at the time of sampling. **(e)** The frequency of CXCR5+PD-1<sup>hi</sup> Tfh cells correlates negatively with age. Correlation was calculated by pooling all samples analyzed and is expressed together with the *p* value next to plot. **(f)** Expression of surface markers (TIGIT, ICOS, CD27, HLA-DR and CCR2) on manually gated CXCR5-PD-1<sup>hi</sup> T cells in a total of 15 children with T1D and 15 healthy controls (validation cohort). **(g)** Manually gated CXCR5-PD-1<sup>hi</sup>TIGIT<sup>+</sup> memory T cell frequencies in 15 children with T1D and 15 healthy controls. Median values with interquartile range are shown. \**p*<0.05 and \*\**p*<0.01; Kruskal–Wallis test with Dunn’s post hoc test or Mann–Whitney *U* test
